# Supplementary material for: Sources and fate of nitrate in groundwater at agricultural operations overlying glacial sediments
Source: Copernicus journal article supplement (doi:10.5194/hess-2018-31), 2018-02-13
Supplement: Supplementary file 1 [file hess-2018-31-supplement.pdf]

# Supplementary Material

## Measured hydraulic heads and gradients

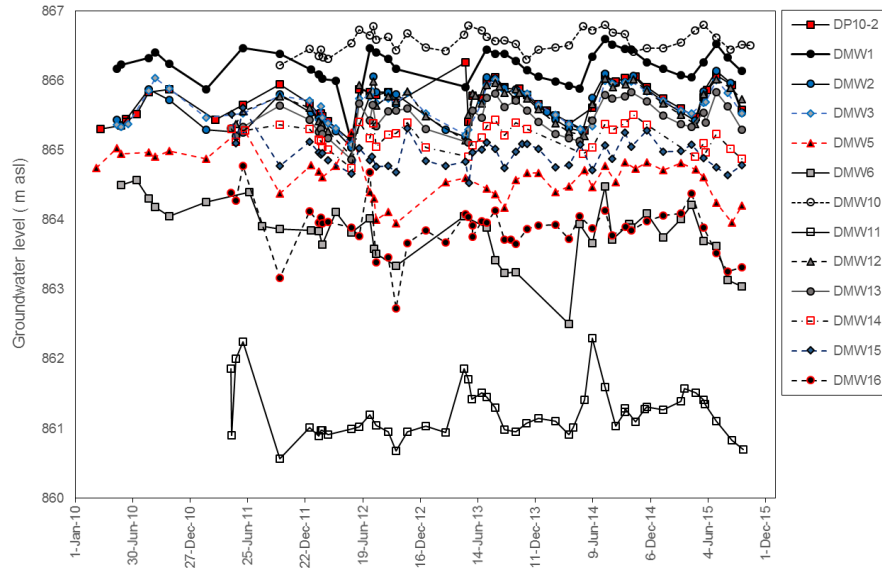

Figure S1. Time series of hydraulic heads measured in water table monitoring wells at CFO1

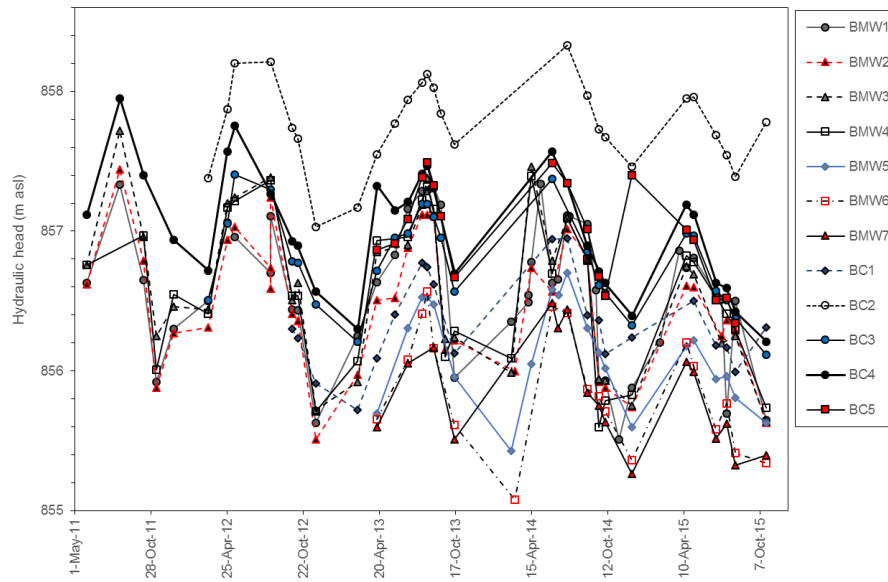

**Figure S2. Time series of hydraulic heads measured in water table monitoring wells at CFO4**

**5 Table S1. Horizontal hydraulic gradients at CFO1 at the water table.**

| Well IDs         | Horizontal hydraulic gradient |
|------------------|-------------------------------|
| DMW1 and DP10-2  | $4.63 \times 10^{-3}$         |
| DMW2 and DMW-16  | $6.06 \times 10^{-3}$         |
| DP10-2 and DMW5  | $4.39 \times 10^{-3}$         |
| DP10-2 and DMW11 | $9.74 \times 10^{-3}$         |
| DMW10 and DMW11  | $1.38 \times 10^{-2}$         |

**Table S2. Mean vertical gradients between nested water table wells and piezometers at CFO1**

| Well IDs           | Vertical hydraulic gradient |
|--------------------|-----------------------------|
| DMW10 and DP11-10b | $3.34 \times 10^{-3}$       |
| DMW11 and DP11-11b | $-2.79 \times 10^{-2}$      |
| DMW12 and DP11-12b | $2.20 \times 10^{-3}$       |
| DMW13 and DP11-13b | $1.36 \times 10^{-2}$       |
| DMW14 and DP11-14b | $1.80 \times 10^{-3}$       |
| DMW15 and DP11-15b | $3.37 \times 10^{-2}$       |
| DMW16 and DP11-16b | $2.86 \times 10^{-2}$       |
| DP10-2 and DP10-1  | $1.78 \times 10^{-1}$       |

**Table S3. Horizontal hydraulic gradients at CFO4 at the water table.**

| Well IDs      | Horizontal hydraulic gradient |
|---------------|-------------------------------|
| BC2 and BMW2  | $3.94 \times 10^{-3}$         |
| BMW2 and BMW7 | $4.32 \times 10^{-3}$         |
| BC2 and BMW7  | $3.79 \times 10^{-3}$         |

5

**Table S4. Mean vertical hydraulic gradients in nested water table wells and piezometers at CFO4**

| Well IDs          | Vertical hydraulic gradient |
|-------------------|-----------------------------|
| BMW2 and BM10-15e | $4.61 \times 10^{-2}$       |
| BMW4 and BP10-15w | $4.22 \times 10^{-2}$       |
| BMW5 and BP5-15   | $4.46 \times 10^{-2}$       |
| BMW6 and BP6-15   | $4.16 \times 10^{-2}$       |

10

## Measured hydrochemistry data

**Table S5. Measured concentrations of chloride (Cl<sup>-</sup>), bicarbonate (HCO<sub>3</sub><sup>-</sup>), dissolved organic carbon (DOC), and N-species (NH<sub>3</sub>-N, NO<sub>3</sub>-N, NO<sub>2</sub>-N, and TKN) in groundwater wells and water filtered from the EMS and catch basin at CFO1 (mean ± standard deviation).**

| Sample ID            | Cl <sup>-</sup><br>(mg L <sup>-1</sup> ) | HCO <sub>3</sub> <sup>-</sup><br>(mg L <sup>-1</sup> ) | DOC<br>(mg L <sup>-1</sup> ) | NH <sub>3</sub> -N<br>(mg L <sup>-1</sup> ) | NO <sub>3</sub> -N*<br>(mg L <sup>-1</sup> ) | NO <sub>2</sub> -N<br>(mg L <sup>-1</sup> ) | TKN<br>(mg L <sup>-1</sup> ) |
|----------------------|------------------------------------------|--------------------------------------------------------|------------------------------|---------------------------------------------|----------------------------------------------|---------------------------------------------|------------------------------|
| EMS filtrate         | 719 ± 272<br>(n=6)                       | 5498 ± 680<br>(n=6)                                    | 1781 ± 1026<br>(n=3)         | 806 ± 303<br>(n=6)                          | <0.7<br>(n=5)                                | -                                           | -                            |
| Catch basin filtrate | 439 ± 322<br>(n=5)                       | 979 ± 937<br>(n=5)                                     | 576 ± 408<br>(n=3)           | 5.9 ± 3.1<br>(n=5)                          | <0.5<br>(n=5)                                | -                                           | -                            |
| DMW1                 | 50 ± 40<br>(n=18)                        | 453 ± 82<br>(n=18)                                     | 6.4 ± 1.4<br>(n=4)           | <0.1<br>(n=18)                              | 6.5 ± 3.6<br>(n=18)                          | <0.1<br>(n=18)                              | 0.6 ± 0.2<br>(n=18)          |
| DMW2                 | 404 ± 186<br>(n=20)                      | 339 ± 61<br>(n=20)                                     | 3.5 ± 0.5<br>(n=5)           | 0.1 ± 0<br>(n=20)                           | 1.2 ± 1.3<br>(n=20)                          | <0.1<br>(n=20)                              | 0.5 ± 0.6<br>(n=20)          |
| DMW3                 | 871 ± 146<br>(n=22)                      | 4362 ± 476<br>(n=22)                                   | 282.1 ± 30<br>(n=5)          | 373.4 ±<br>79.4 (n=22)                      | 1.1 ± 2.7<br>(n=22)                          | 2.7 ± 8.3<br>(n=22)                         | 424.0 ± 73.6<br>(n=22)       |
| DMW4                 | 50 ± 24<br>(n=21)                        | 448 ± 57<br>(n=21)                                     | 4.5 ± 0.8<br>(n=5)           | 0.2 ± 0.7<br>(n=21)                         | 0.1 ± 0.2<br>(n=21)                          | <0.1<br>(n=21)                              | 0.5 ± 1.3<br>(n=21)          |
| DMW5                 | 35 ± 11<br>(n=22)                        | 534 ± 30<br>(n=22)                                     | 6.6 ± 1.0<br>(n=5)           | 0.1 ± 0.1<br>(n=22)                         | 1.0 ± 0.5<br>(n=22)                          | <0.1<br>(n=22)                              | 0.4 ± 0.1<br>(n=22)          |
| DMW6                 | 394 ± 25<br>(n=21)                       | 778 ± 67<br>(n=21)                                     | 25.8 ± 5.4<br>(n=5)          | 4.0 ± 1.0<br>(n=21)                         | 0.2 ± 0.2<br>(n=21)                          | <0.1<br>(n=21)                              | 6.6 ± 0.9<br>(n=21)          |
| DMW10                | 234 ± 7<br>(n=17)                        | 712 ± 15<br>(n=17)                                     | 58.5 ± 1.0<br>(n=5)          | 0.2 ± 0.1<br>(n=17)                         | 0.1 ± 0.2<br>(n=17)                          | 0.1 ± 0<br>(n=17)                           | 3.1 ± 0.1<br>(n=17)          |
| DMW11                | 437 ± 121<br>(n=16)                      | 771 ± 38<br>(n=16)                                     | 18.0 ± 1.7<br>(n=5)          | 0.3 ± 0.2<br>(n=16)                         | 18.5 ± 2.7<br>(n=16)                         | 0.1 ± 0.3<br>(n=16)                         | 1.6 ± 0.8<br>(n=16)          |
| DMW12                | 75 ± 11<br>(n=16)                        | 405 ± 24<br>(n=16)                                     | 3.9 ± 0.6<br>(n=5)           | 0.1 ± 0.1<br>(n=16)                         | 2.8 ± 0.5<br>(n=16)                          | 0.1 ± 0<br>(n=16)                           | 0.3 ± 0.2<br>(n=16)          |
| DMW13                | 70 ± 19<br>(n=16)                        | 767 ± 119<br>(n=16)                                    | 7.7 ± 1.7<br>(n=5)           | 0.9 ± 1.0<br>(n=16)                         | 19.2 ± 8.7<br>(n=16)                         | 0.2 ± 0.2<br>(n=16)                         | 1.8 ± 1.4<br>(n=16)          |
| DMW14                | 7 ± 5<br>(n=15)                          | 445 ± 66<br>(n=15)                                     | 3.7 ± 0.6<br>(n=5)           | 0.3 ± 0.1<br>(n=15)                         | <0.1<br>(n=15)                               | <0.1<br>(n=15)                              | 0.3 ± 0.2<br>(n=15)          |
| DMW15                | 14 ± 1<br>(n=16)                         | 670 ± 32<br>(n=16)                                     | 3.8 ± 0.9<br>(n=5)           | 0.1 ± 0<br>(n=16)                           | <0.1<br>(n=16)                               | <0.1<br>(n=16)                              | <0.2<br>(n=16)               |
| DMW16                | 65 ± 7<br>(n=16)                         | 604 ± 18<br>(n=16)                                     | 7.3 ± 0.5<br>(n=5)           | <0.1<br>(n=16)                              | 0.1 ± 0.1<br>(n=16)                          | <0.1<br>(n=16)                              | 0.3 ± 0.1<br>(n=16)          |
| DP10-1               | <5<br>(n=23)                             | 467 ± 19<br>(n=23)                                     | 3.7 ± 0.5<br>(n=5)           | 0.7 ± 0.1<br>(n=23)                         | <0.1<br>(n=23)                               | <0.1<br>(n=23)                              | 1.0 ± 0.5<br>(n=23)          |
| DP10-2               | 68 ± 16<br>(n=22)                        | 701 ± 36<br>(n=22)                                     | 6.3 ± 1.1<br>(n=5)           | 1.2 ± 0.9<br>(n=22)                         | 12.6 ± 4.5<br>(n=22)                         | 0.1 ± 0.1<br>(n=22)                         | 2.1 ± 0.9<br>(n=22)          |
| DP11-10b             | 22 ± 14<br>(n=17)                        | 689 ± 102<br>(n=17)                                    | 30.3 ± 24.9<br>(n=5)         | 0.5 ± 0.1<br>(n=17)                         | 0.5 ± 1.7<br>(n=17)                          | <0.1<br>(n=17)                              | 0.7 ± 0.2<br>(n=17)          |
| DP11-11b             | 16 ± 3<br>(n=16)                         | 604 ± 67<br>(n=16)                                     | 8.9 ± 2.2<br>(n=5)           | 1.2 ± 0<br>(n=16)                           | <0.1<br>(n=16)                               | <0.1<br>(n=16)                              | 1.3 ± 0.1<br>(n=16)          |
| DP11-12b             | 98 ± 20<br>(n=15)                        | 492 ± 23<br>(n=15)                                     | 6.5 ± 0.6<br>(n=5)           | 0.1 ± 0.1<br>(n=15)                         | 1.4 ± 1.3<br>(n=15)                          | <0.1<br>(n=15)                              | 0.5 ± 0.1<br>(n=15)          |
| DP11-13b             | 15 ± 3<br>(n=16)                         | 436 ± 26<br>(n=16)                                     | 11.7 ± 4.2<br>(n=5)          | 0.7 ± 0<br>(n=16)                           | <0.1<br>(n=16)                               | <0.1<br>(n=16)                              | 0.9 ± 0.1<br>(n=16)          |
| DP11-14b             | 6 ± 3<br>(n=16)                          | 461 ± 47<br>(n=16)                                     | 7.3 ± 1.1<br>(n=5)           | 0.9 ± 0.1<br>(n=16)                         | <0.1<br>(n=16)                               | <0.1<br>(n=16)                              | 1.0 ± 0.1<br>(n=16)          |
| DP11-15b             | 6 ± 2<br>(n=17)                          | 442 ± 91<br>(n=17)                                     | 6.4 ± 2.6<br>(n=6)           | 0.7 ± 0.1<br>(n=17)                         | <0.1<br>(n=17)                               | <0.1<br>(n=17)                              | 0.8 ± 0.2<br>(n=17)          |
| DP11-16b             | 33 ± 3<br>(n=17)                         | 531 ± 55<br>(n=17)                                     | 9.0 ± 8.4<br>(n=5)           | 0.8 ± 0.1<br>(n=17)                         | <0.1<br>(n=17)                               | 0.1 ± 0<br>(n=17)                           | 0.9 ± 0.1<br>(n=17)          |

5 \*For EMS filtrate and catch basin filtrate, these values are NO<sub>3</sub>-N + NO<sub>2</sub>-N

**Table S6. Measured concentrations of chloride (Cl<sup>-</sup>), bicarbonate (HCO<sub>3</sub><sup>-</sup>), dissolved organic carbon (DOC), and N-species (NH<sub>3</sub>-N, NO<sub>3</sub>-N, NO<sub>2</sub>-N, and TKN) in groundwater wells and water filtered from the EMS at CFO4 (mean ± standard deviation).**

| Sample ID    | Cl <sup>-</sup><br>(mg L <sup>-1</sup> ) | HCO <sub>3</sub> <sup>-</sup><br>(mg L <sup>-1</sup> ) | DOC<br>(mg L <sup>-1</sup> ) | NH <sub>3</sub> -N<br>(mg L <sup>-1</sup> ) | NO <sub>3</sub> -N*<br>(mg L <sup>-1</sup> ) | NO <sub>2</sub> -N<br>(mg L <sup>-1</sup> ) | TKN<br>(mg L <sup>-1</sup> ) |
|--------------|------------------------------------------|--------------------------------------------------------|------------------------------|---------------------------------------------|----------------------------------------------|---------------------------------------------|------------------------------|
| EMS filtrate | 1074 ± 379 (n=2)                         | 5795 ± 1544 (n=2)                                      | 3367 (n=1)                   | 865 ± 182 (n=2)                             | <0.7 (n=2)                                   | -                                           | -                            |
| BC1          | <10 (n=11)                               | 494 ± 13 (n=11)                                        | 5.0 ± 0.8 (n=4)              | <0.1 (n=11)                                 | <0.1 (n=11)                                  | <0.1 (n=11)                                 | <0.2 (n=11)                  |
| BC2          | 6 ± 3 (n=12)                             | 516 ± 33 (n=12)                                        | 6.0 ± 3.0 (n=4)              | <0.1 (n=12)                                 | 1.1 ± 2.7 (n=12)                             | <0.1 (n=12)                                 | 0.3 ± 0.2 (n=12)             |
| BC3          | <5 (n=13)                                | 504 ± 21 (n=13)                                        | 6.9 ± 2.9 (n=4)              | <0.1 (n=13)                                 | 0.1 ± 0.1 (n=13)                             | <0.1 (n=13)                                 | 0.2 ± 0.1 (n=13)             |
| BC4          | 58 ± 64 (n=24)                           | 576 ± 110 (n=24)                                       | 9.2 ± 3.5 (n=9)              | <0.1 (n=24)                                 | 8.8 ± 13.2 (n=24)                            | <0.1 (n=24)                                 | 0.8 ± 0.8 (n=24)             |
| BC5          | 26 ± 6 (n=8)                             | 498 ± 51 (n=8)                                         | 6.8 ± 3.1 (n=3)              | <0.1 (n=8)                                  | 5.7 ± 1.5 (n=8)                              | <0.1 (n=8)                                  | 0.6 ± 0.4 (n=8)              |
| BMW1         | 305 ± 251 (n=28)                         | 926 ± 190 (n=28)                                       | 21.5 ± 12.4 (n=11)           | <0.1 (n=28)                                 | 2.2 ± 2.5 (n=28)                             | <0.1 (n=28)                                 | 1.1 ± 0.9 (n=28)             |
| BMW2         | 502 ± 97 (n=22)                          | 1186 ± 87 (n=22)                                       | 20.2 ± 4.9 (n=9)             | <0.1 (n=22)                                 | 6.0 ± 7.4 (n=22)                             | 0.1 ± 0.1 (n=22)                            | 1.7 ± 0.4 (n=22)             |
| BMW3         | 182 ± 81 (n=25)                          | 881 ± 146 (n=25)                                       | 15.6 ± 3.3 (n=9)             | <0.1 (n=25)                                 | 17.4 ± 10.3 (n=25)                           | 0.1 ± 0.1 (n=25)                            | 1.6 ± 0.8 (n=25)             |
| BMW4         | 188 ± 74 (n=24)                          | 666 ± 55 (n=24)                                        | 12.0 ± 3.3 (n=11)            | <0.1 (n=24)                                 | 33.6 ± 21.1 (n=24)                           | 0.2 ± 0.3 (n=24)                            | 2.6 ± 2.9 (n=24)             |
| BMW5         | 106 ± 23 (n=8)                           | 975 ± 163 (n=8)                                        | 8.6 ± 1.3 (n=3)              | <0.1 (n=8)                                  | 6.5 ± 4.8 (n=8)                              | 0.1 ± 0 (n=8)                               | 0.7 ± 0.3 (n=8)              |
| BMW6         | 156 ± 18 (n=8)                           | 538 ± 27 (n=8)                                         | 6.9 ± 1.7 (n=3)              | <0.1 (n=8)                                  | 0.4 ± 0.2 (n=8)                              | 0.1 ± 0 (n=8)                               | 0.5 ± 0.1 (n=8)              |
| BMW7         | 127 ± 15 (n=8)                           | 699 ± 65 (n=8)                                         | 8.1 ± 2.8 (n=3)              | <0.1 (n=8)                                  | 9.2 ± 3.0 (n=8)                              | 0.1 ± 0 (n=8)                               | 0.7 ± 0.4 (n=8)              |
| BP10-15e     | 7 ± 4 (n=19)                             | 493 ± 33 (n=19)                                        | 3.4 ± 0.4 (n=7)              | 0.1 ± 0.1 (n=19)                            | 0.1 ± 0.1 (n=19)                             | <0.1 (n=19)                                 | 0.2 ± 0.1 (n=19)             |
| BP10-15w     | <5 (n=17)                                | 507 ± 11 (n=17)                                        | 3.5 ± 0.6 (n=4)              | <0.2 (n=17)                                 | 0.3 ± 1.0 (n=17)                             | <0.1 (n=17)                                 | 0.2 ± 0.1 (n=17)             |
| BP5-15       | <5 (n=8)                                 | 509 ± 12 (n=8)                                         | 5.0 ± 1.1 (n=3)              | <0.1 (n=8)                                  | <0.1 (n=8)                                   | <0.1 (n=8)                                  | <0.2 (n=8)                   |
| BP6-15       | <5 (n=7)                                 | 487 ± 7 (n=7)                                          | 3.3 ± 1.1 (n=3)              | <0.2 (n=7)                                  | <0.1 (n=7)                                   | <0.1 (n=7)                                  | <0.2 (n=7)                   |

\*For EMS filtrate, this value is NO<sub>3</sub>-N + NO<sub>2</sub>-N

**Table S7. Hydrochemistry of water from continuous core samples**

| Core ID | Depth (m BG) | Lithology  | Cl- (mg L <sup>-1</sup> ) | NH <sub>3</sub> -N (mg L <sup>-1</sup> ) | NO <sub>3</sub> -N (mg L <sup>-1</sup> ) | NO <sub>2</sub> -N (mg L <sup>-1</sup> ) | NO <sub>3</sub> -N/Cl- |
|---------|--------------|------------|---------------------------|------------------------------------------|------------------------------------------|------------------------------------------|------------------------|
| DC15-20 | 2            | Sand       | 76.4                      | 4.27                                     | 0.64                                     | 4.99                                     | 0.008                  |
|         | 3            | Sand       | 47.2                      | 2.02                                     | 2.42                                     | 3.75                                     | 0.051                  |
|         | 4            | Sand       | 22.3                      | 2.45                                     | 1.76                                     | 0.12                                     | 0.079                  |
|         | 5            | Sand       | 21.0                      | 1.88                                     | 0.96                                     | 0.07                                     | 0.046                  |
|         | 6            | Sand       | 28.2                      | 2.12                                     | 1.16                                     | 0.14                                     | 0.041                  |
|         | 7            | Sand       | 27.2                      | 2.19                                     | 0.89                                     | 0.33                                     | 0.033                  |
|         | 8            | Sand       | 28.5                      | 2.85                                     | 14.39                                    | 0.32                                     | 0.505                  |
|         | 9            | Sand       | 12.9                      | 1.29                                     | 0.68                                     | 1.39                                     | 0.053                  |
|         | 10           | Sand       | 35.7                      | 1.95                                     | 2.05                                     | 0.81                                     | 0.057                  |
|         | 10.5         | Sand       | 33.0                      | 0.00                                     | 4.10                                     | 0.00                                     | 0.124                  |
|         | 11           | Sand       | 64.1                      | 2.17                                     | 1.38                                     | 1.23                                     | 0.022                  |
|         | 12           | Sand       | 112.4                     | 2.17                                     | 2.12                                     | 0.03                                     | 0.019                  |
|         | 13           | Sand       | 119.8                     | 1.70                                     | 2.77                                     | 0.30                                     | 0.023                  |
|         | 14           | Sand       | 75.6                      | 1.06                                     | 0.85                                     | 2.20                                     | 0.011                  |
|         | 15           | Sand       | 56.3                      | 2.30                                     | 2.04                                     | 0.00                                     | 0.036                  |
| DC15-21 | 2            | Sand       | 147.6                     | 1.37                                     | 0.14                                     | 1.83                                     | 0.001                  |
|         | 2.5          | Sand       | 23.7                      | 0.82                                     | 0.90                                     | 0.29                                     | 0.038                  |
|         | 3.5          | Sand       | 18.0                      | 1.29                                     | 3.72                                     | 1.78                                     | 0.207                  |
|         | 4.5          | Sand       | 20.5                      | 1.91                                     | 4.74                                     | 0.26                                     | 0.232                  |
|         | 5            | Sand       | 29.7                      | 1.24                                     | 3.59                                     | 0.00                                     | 0.121                  |
|         | 6            | Sand       | 22.8                      | 2.00                                     | 0.95                                     | 0.04                                     | 0.042                  |
|         | 7            | Sand       | 33.6                      | 2.98                                     | 1.93                                     | 0.25                                     | 0.058                  |
|         | 8            | Sand       | 24.4                      | 1.67                                     | 4.07                                     | 0.16                                     | 0.167                  |
|         | 9            | Sand       | 25.6                      | 3.26                                     | 3.65                                     | 0.08                                     | 0.142                  |
|         | 10           | Sand       | 21.5                      | 0.82                                     | 1.28                                     | 0.21                                     | 0.060                  |
| DC15-22 | 2            | Sand       | 72.9                      | 1.19                                     | 13.44                                    | 0.00                                     | 0.184                  |
|         | 2.5          | Clay       | 72.8                      | 0.84                                     | 17.52                                    | 3.73                                     | 0.241                  |
|         | 3            | Sand       | 79.8                      | 0.76                                     | 16.66                                    | 0.12                                     | 0.209                  |
|         | 4            | Sand       | 109.8                     | 1.94                                     | 22.88                                    | 1.28                                     | 0.208                  |
|         | 5            | Sand       | 60.8                      | 2.59                                     | 12.82                                    | 2.17                                     | 0.211                  |
|         | 6.5          | Sand       | 99.2                      | 3.20                                     | 4.68                                     | 4.04                                     | 0.047                  |
|         | 7            | Sand       | 88.4                      | 2.40                                     | 9.90                                     | 0.00                                     | 0.112                  |
|         | 7            | Sand       | 95.0                      | 0.00                                     | 6.08                                     | 2.80                                     | 0.064                  |
|         | 8            | Sand       | 75.8                      | 1.92                                     | 12.89                                    | 0.00                                     | 0.170                  |
|         | 9.5          | Sandy clay | 157.7                     | 1.54                                     | 39.50                                    | 2.04                                     | 0.251                  |
|         | 10           | Sandy clay | 73.0                      | 1.55                                     | 10.99                                    | 0.29                                     | 0.151                  |
|         | 11           | Sand       | 107.7                     | 3.32                                     | 12.10                                    | 0.82                                     | 0.112                  |
| 12      | Sand         | 91.4       | 1.14                      | 15.60                                    | 1.45                                     | 0.171                                    |                        |
| DC15-23 | 2            | Clay       | 70.0                      | 0.94                                     | 66.40                                    | 1.35                                     | 0.948                  |
|         | 3            | Clay       | 122.2                     | 0.76                                     | 9.48                                     | 1.87                                     | 0.078                  |
|         | 4            | Clay       | 48.8                      | 5.87                                     | 8.90                                     | 0.86                                     | 0.182                  |
|         | 5            | Clay       | 56.1                      | 4.62                                     | 10.53                                    | 0.63                                     | 0.188                  |
|         | 6            | Sand       | 98.2                      | 8.59                                     | 7.05                                     | 1.87                                     | 0.072                  |
|         | 6.5          | Sand       | 61.2                      | 1.86                                     | 9.76                                     | 2.93                                     | 0.160                  |
|         | 7            | Sand       | 84.9                      | 1.57                                     | 10.17                                    | 0.25                                     | 0.120                  |
|         | 7.5          | Sand       | 57.5                      | 2.60                                     | 10.51                                    | 0.06                                     | 0.183                  |
|         | 8            | Sand       | 67.8                      | 2.24                                     | 9.88                                     | 1.13                                     | 0.146                  |
|         | 8.5          | Clay       | 106.1                     | 9.82                                     | 7.47                                     | 0.31                                     | 0.070                  |
|         | 9            | Sand       | 85.5                      | 11.70                                    | 12.69                                    | 0.92                                     | 0.148                  |
|         | 9.5          | Sand       | 72.4                      | 9.75                                     | 17.27                                    | 1.85                                     | 0.238                  |
|         | 11           | Sand       | 82.6                      | 9.20                                     | 21.05                                    | 0.07                                     | 0.255                  |
|         | 11.5         | Sand       | 68.5                      | 2.99                                     | 20.88                                    | 1.02                                     | 0.305                  |
|         | 12           | Clay       | 87.9                      | 0.69                                     | 1.52                                     | 2.06                                     | 0.017                  |
| 13      | Clay         | 22.9       | 5.07                      | 1.01                                     | 0.00                                     | 0.044                                    |                        |
| 14      | Clay         | 17.9       | 1.80                      | 1.16                                     | 0.34                                     | 0.065                                    |                        |
| 15      | Clay         | 12.6       | 1.47                      | 1.01                                     | 0.32                                     | 0.080                                    |                        |

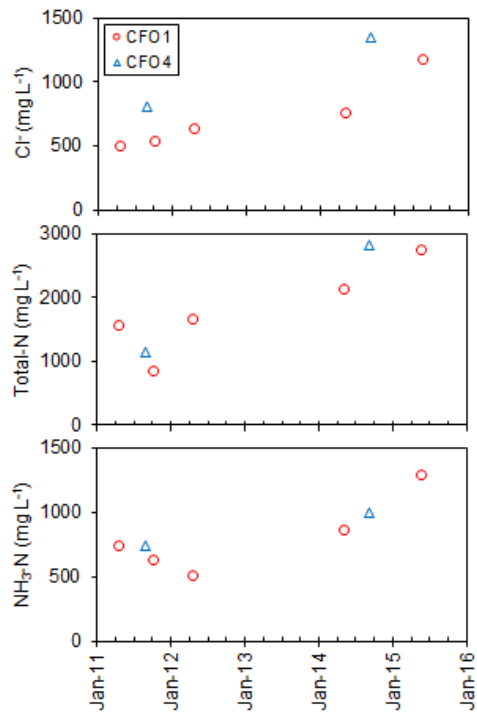

Figure S3. Concentrations of Cl<sup>-</sup>, total-N, and NH<sub>3</sub>-N in water filtered from the EMS slurry at CFO1 and CFO4.

### **Stable isotopes of water and nitrate**

Samples for the stable isotopes of water ( $\delta^2\text{H}$  and  $\delta^{18}\text{O}_{\text{H}_2\text{O}}$ ) were collected from wells at CFO1 quarterly between February 2011 and August 2013. Samples for stable isotopes of water were collected from wells at CFO4 on 16 October 2013. Wells were purged prior to sample collection (1–3 casing volumes) in 20 mL HDPE bottles. Core samples for analysis of stable isotopes of water were stored in Ziploc™ bags and kept cool until analysis.

Stable isotopes of water ( $\delta^2\text{H}$  and  $\delta^{18}\text{O}_{\text{H}_2\text{O}}$ ) in groundwater samples from wells and pore water squeezed from continuous core were analyzed using a Los Gatos LGR model 908-0008 liquid water isotope analyzer (off-axis integrated cavity output spectroscopy) (Lis et al., 2008). The accuracy of this method is  $\pm 0.8\text{‰}$  for  $\delta^2\text{H}$  and  $\pm 0.1\text{‰}$  for  $\delta^{18}\text{O}_{\text{H}_2\text{O}}$ . Pore water from continuous core collected in 2015 was analyzed for  $\delta^2\text{H}$  and  $\delta^{18}\text{O}_{\text{H}_2\text{O}}$  using the vapour equilibration method (Wassenaar et al. (2008). The Ziploc bag containing the core sample was filled with dry air to equilibrate with the pore water vapour for 3 days at room temperature. The isotopic values of this equilibrated vapour was then analyzed using a Picarro L1102-*i* water isotope analyzer. The precision of this analysis is  $\pm 2.0\text{‰}$  for  $\delta^2\text{H}$  and  $\pm 4.0\text{‰}$  for  $\delta^{18}\text{O}_{\text{H}_2\text{O}}$ . Stable isotopic values of ground water were predominantly close to Calgary meteoric water line (Peng et al., 2004) with  $\delta^2\text{H}_{\text{H}_2\text{O}}$  ranging from -175.9 to 117.2‰ and  $\delta^{18}\text{O}_{\text{H}_2\text{O}}$  ranging from -22.5 to -12.9‰.



**Table S8. Stable isotope values of water and nitrate at CFO1**

| Site        | Well ID*     | $\delta^{18}\text{O}_{\text{H}_2\text{O}}$ | $\delta^2\text{H}_{\text{H}_2\text{O}}$ | $\delta^{18}\text{O}_{\text{NO}_3}$ | $\delta^{15}\text{N}_{\text{NO}_3}$ |
|-------------|--------------|--------------------------------------------|-----------------------------------------|-------------------------------------|-------------------------------------|
| CFO1†       | DMW1         | -16.7 ± 1.3 (n=4)                          | -136.2 ± 10.3 (n=4)                     | -0.5 ± (n=1)                        | 12.6 ± (n=1)                        |
|             | DMW2         | -15.5 ± 0.6 (n=7)                          | -126.9 ± 4.4 (n=7)                      | 6.0 ± 2.0 (n=2)                     | 20.6 ± 0.3 (n=2)                    |
|             | DMW3         | -13.8 ± 0.5 (n=9)                          | -118.2 ± 0.8 (n=9)                      | -1.2 (n=1)                          | 7.8 (n=1)                           |
|             | DMW4         | -14.2 ± 0.4 (n=7)                          | -119.9 ± 0.9 (n=7)                      | -                                   | -                                   |
|             | DMW5         | -14.9 ± 0.5 (n=7)                          | -124.1 ± 1.8 (n=7)                      | 19.7 ± 0.1 (n=2)                    | 61.3 ± 0.1 (n=2)                    |
|             | DMW6         | -15.2 ± 0.2 (n=7)                          | -126.8 ± 0.9 (n=7)                      | -                                   | -                                   |
|             | DMW10        | -17.8 ± 0.2 (n=8)                          | -143.6 ± 0.9 (n=8)                      | -                                   | -                                   |
|             | DMW11        | -16.6 ± 0.2 (n=7)                          | -134.6 ± 1.1 (n=7)                      | 10.6 ± 0.4 (n=2)                    | 33.2 ± 0.1 (n=2)                    |
|             | DMW12        | -15.7 ± 0.3 (n=7)                          | -127.7 ± 0.5 (n=7)                      | 13.0 ± 1.9 (n=2)                    | 28.4 ± 2.1 (n=2)                    |
|             | DMW13        | -16.1 ± 0.6 (n=7)                          | -127.7 ± 3.4 (n=7)                      | 5.8 ± 1.4 (n=2)                     | 23.0 ± 0.1 (n=2)                    |
|             | DMW14        | -14.5 ± 0.6 (n=7)                          | -121.7 ± 2.4 (n=7)                      | -                                   | -                                   |
|             | DMW15        | -15.0 ± 0.2 (n=8)                          | -125.5 ± 1.1 (n=8)                      | -                                   | -                                   |
|             | DMW16        | -15.4 ± 0.3 (n=7)                          | -128.5 ± 1.2 (n=7)                      | -                                   | -                                   |
|             | DP10-1       | -18.0 ± 0.7 (n=9)                          | -145.8 ± 2.4 (n=9)                      | 11.5 (n=1)                          | 1.6 ± (n=1)                         |
|             | DP10-2       | -16.8 ± 0.3 (n=9)                          | -131.8 ± 2.6 (n=9)                      | 3.6 ± 1.8 (n=2)                     | 22.0 ± 3.2 (n=2)                    |
|             | DP11-10b     | -19.1 ± 0.3 (n=8)                          | -152.9 ± 0.7 (n=8)                      | -                                   | -                                   |
|             | DP11-11b     | -21.6 ± 0.3 (n=7)                          | -171.0 ± 0.8 (n=7)                      | -                                   | -                                   |
|             | DP11-12b     | -15.4 ± 0.5 (n=7)                          | -126.0 ± 1.3 (n=7)                      | 18.8 ± 2.5 (n=2)                    | 39.7 ± 5.4 (n=2)                    |
|             | DP11-13b     | -18.3 ± 0.2 (n=7)                          | -146.7 ± 1.2 (n=7)                      | -                                   | -                                   |
|             | DP11-14b     | -21.1 ± 0.4 (n=9)                          | -165.7 ± 2.2 (n=9)                      | -                                   | -                                   |
|             | DP11-15b     | -22.2 ± 0.3 (n=8)                          | -174.0 ± 1.0 (n=8)                      | -                                   | -                                   |
|             | DP11-16b     | -20.8 ± 0.4 (n=7)                          | -163.6 ± 0.7 (n=7)                      | -                                   | -                                   |
|             | EMS filtrate |                                            |                                         | 13.1 ± 6.5 (n=4)                    | 2.6 ± 2.1 (n=4)                     |
|             | DP11-13_4m   |                                            |                                         | 9.8                                 | 30.3                                |
|             | DP11-13_5m   |                                            |                                         | 10.8                                | 31.0                                |
|             | DP11-13_6m   |                                            |                                         | 5.2                                 | 24.5                                |
|             | DP11-13_7m   |                                            |                                         | 10.2                                | 31.6                                |
|             | DP11-13_8m   |                                            |                                         | 14.0                                | 36.4                                |
|             | DP11-13_9m   |                                            |                                         | 9.9                                 | 29.6                                |
|             | C15-20_3m    | -116.0                                     | -12.8                                   | 9.7                                 | -0.9                                |
|             | C15-20_8m    | -117.2                                     | -13.9                                   | -1.2                                | -5.2                                |
|             | C15-20_13m   | -118.4                                     | -13.8                                   | 16.0                                | 1.3                                 |
|             | C15-21_2m    | -116.1                                     | -13.5                                   | 3.6                                 | 23.3                                |
|             | C15-21_8m    | -113.0                                     | -12.8                                   | -4.9                                | 6.2                                 |
| C15-22_2m   | -130.0       | -16.1                                      | 4.7                                     | 22.2                                |                                     |
| C15-22_4m   | -128.3       | -15.2                                      | 2.8                                     | 21.6                                |                                     |
| C15-22_5m   | -134.3       | -16.8                                      | 3.9                                     | 15.7                                |                                     |
| C15-22_6.5m | -134.0       | -16.4                                      | 16.8                                    | 30.8                                |                                     |
| C15-22_8m   | -135.3       | -17.5                                      | 5.6                                     | 21.1                                |                                     |
| C15-22_10m  | -132.6       | -16.9                                      | 7.4                                     | 26.1                                |                                     |
| C15-22_12m  | -133.2       | -17.0                                      | 3.3                                     | 18.5                                |                                     |
| C15-23_2m   | -134.7       | -16.8                                      | 1.7                                     | 22.1                                |                                     |
| C15-23_5m   | -137.6       | -17.8                                      | 5.9                                     | 15.6                                |                                     |
| C15-23_7m   | -132.5       | -16.2                                      | 4.6                                     | 14.8                                |                                     |
| C15-23_8m   | -132.3       | -16.6                                      | 1.46                                    | 14.3                                |                                     |
| C15-23_9m   | -132.7       | -16.3                                      | 4.9                                     | 16.7                                |                                     |
| C15-23_11m  | -131.8       | -15.9                                      | 1.3                                     | 13.7                                |                                     |
| C15-23_13m  | -139.4       | -16.2                                      | 15.7                                    | 15.6                                |                                     |

† For all continuous core samples n=1. \*central depth of core samples, x, indicated as SampleID\_xm

**Table S9. Stable isotope values of water and nitrate at CFO4**

| Site  | Well ID  | $\delta^{18}\text{O}_{\text{H}_2\text{O}}$ | $\delta^2\text{H}_{\text{H}_2\text{O}}$ | $\delta^{18}\text{O}_{\text{NO}_3}$ | $\delta^{15}\text{N}_{\text{NO}_3}$ |
|-------|----------|--------------------------------------------|-----------------------------------------|-------------------------------------|-------------------------------------|
| CFO4† | BC1      | -16.7                                      | -142.3                                  | 29.5                                | 0.3                                 |
|       | BC2      | -18.6                                      | -138.6                                  | 15.8                                | 9.4                                 |
|       | BC3      | -17.5                                      | -144.6                                  | 31.6                                | 5.0                                 |
|       | BC4      | -18.5                                      | -148.8                                  | 1.6                                 | 30.6                                |
|       | BC5      | -18.5                                      | -137.6                                  | -1.9                                | 12.6                                |
|       | BMW1     | -17.6                                      | -144.1                                  | -                                   | -                                   |
|       | BMW2     | -17.4                                      | -136.5                                  | 8.3                                 | 41.6                                |
|       | BMW3     | -                                          | -                                       | 2.1                                 | 22.8                                |
|       | BMW4     | -18.0                                      | -145.6                                  | -0.3                                | 22.2                                |
|       | BMW5     | -18.0                                      | -137.5                                  | 6.5                                 | 28.9                                |
|       | BMW6     | -18.9                                      | -152.4                                  | 22.1                                | 70.5                                |
|       | BMW7     | -                                          | -                                       | 5.9                                 | 34.0                                |
|       | BP10-15e | -18.1                                      | -146.5                                  | 18.3                                | 16.4                                |
|       | BP10-15w | -                                          | -                                       | 18.9                                | -1.3                                |
|       | BP5-15   | -17.7                                      | -137.3                                  | -                                   | -                                   |
|       | BP6-15   | -17.9                                      | -145.1                                  | -                                   | -                                   |

† For all samples at CFO4 n=1.

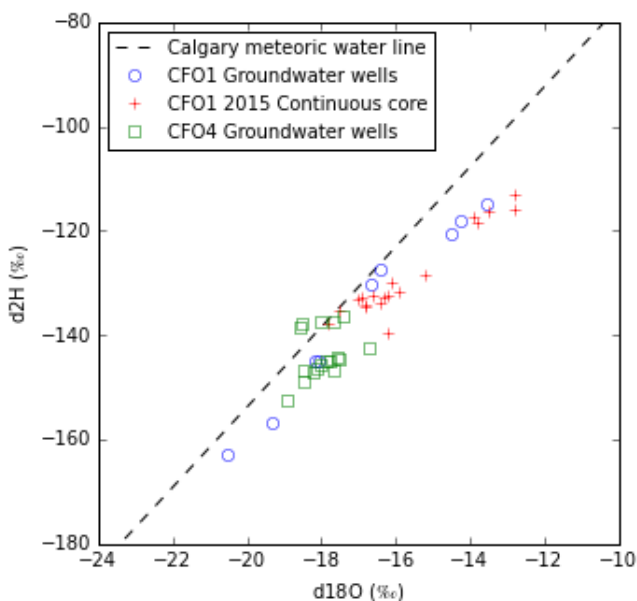

5

**Figure S4. Cross-plot of stable isotopic values of groundwater wells at CFO1 and CFO4 and continuous core samples collected at CFO1 during 2015, relative to the Calgary meteoric water line ( $\delta^2\text{H} = 7.68 \delta^{18}\text{O}_{\text{H}_2\text{O}} - 0.21$ ).**

## References

- Lis, G., Wassenaar, L. I., and Hendry, M. J.: High-precision laser spectroscopy D/H and  $^{18}\text{O}/^{16}\text{O}$  measurements of microliter natural water samples, *Anal. Chem.*, 80, 287-293, 10.1021/ac701716q, 2008.
- Peng, H., Mayer, B., Harris, S., and Roy Krouse, H.: A 10-yr record of stable isotope ratios of hydrogen and oxygen in precipitation at Calgary, Alberta, Canada, *Tellus B*, 56, 147-159, 2004.
- 5 Wassenaar, L. I., Hendry, M. J., Chostner, V. L., and Lis, G. P.: High resolution pore water  $\delta^2\text{H}$  and  $\delta^{18}\text{O}$  measurements by  $\text{H}_2\text{O}(\text{liquid})\text{-H}_2\text{O}(\text{vapor})$  equilibration laser spectroscopy, *Environ. Sci. Technol.*, 42, 9262-9267, 10.1021/es802065s, 2008.
