# Supplementary material for: Sources and fate of nitrate in groundwater at agricultural operations overlying glacial sediments
Source: Copernicus journal article supplement (doi:10.5194/hess-2018-31), 2018-02-13
Supplement: Supplementary file [file hess-2018-31-AC1-supplement.pdf]

# 1 MEASURED pH, DO AND ION CONCENTRATIONS

2 Table R1 Measured pH, DO and concentrations of chloride (Cl<sup>-</sup>), bicarbonate (HCO<sub>3</sub><sup>-</sup>), dissolved  
 3 organic carbon (DOC) and N-species in groundwater wells and water filtered from the EMS and  
 4 catch-basin at CFO1 (mean ± standard deviation).

| Sample ID            | pH (in-situ)        | DO (mg L <sup>-1</sup> ) | Cl <sup>-</sup> (mg L <sup>-1</sup> ) | HCO <sub>3</sub> <sup>-</sup> (mg L <sup>-1</sup> ) | DOC (mg L <sup>-1</sup> ) | NH <sub>3</sub> -N (mg L <sup>-1</sup> ) | NO <sub>3</sub> -N* (mg L <sup>-1</sup> ) | NO <sub>2</sub> -N (mg L <sup>-1</sup> ) | TKN (mg L <sup>-1</sup> ) |
|----------------------|---------------------|--------------------------|---------------------------------------|-----------------------------------------------------|---------------------------|------------------------------------------|-------------------------------------------|------------------------------------------|---------------------------|
| EMS filtrate         | -                   | -                        | 719 ± 272<br>(n=6)                    | 5498 ± 680 (n=6)                                    | 1781 ± 1026<br>(n=3)      | 806 ± 303<br>(n=6)                       | <0.7<br>(n=5)                             | -                                        | -                         |
| Catch-basin filtrate | -                   | -                        | 439 ± 322<br>(n=5)                    | 979 ± 937<br>(n=5)                                  | 576 ± 408<br>(n=3)        | 5.9 ± 3.1<br>(n=5)                       | <0.5<br>(n=5)                             | -                                        | -                         |
| DMW1                 | 7.2 ± 0.9<br>(n=18) | 2.5 ± 1.9<br>(n=12)      | 50 ± 40<br>(n=18)                     | 453 ± 82<br>(n=18)                                  | 6.4 ± 1.4<br>(n=4)        | <0.1<br>(n=18)                           | 6.5 ± 3.6<br>(n=18)                       | <0.1<br>(n=18)                           | 0.6 ± 0.2<br>(n=18)       |
| DMW2                 | 7.7 ± 0.2<br>(n=19) | 2.1 ± 1.9<br>(n=14)      | 404 ± 186<br>(n=20)                   | 339 ± 61<br>(n=20)                                  | 3.5 ± 0.5<br>(n=5)        | 0.1 ± 0<br>(n=20)                        | 1.2 ± 1.3<br>(n=20)                       | <0.1<br>(n=20)                           | 0.5 ± 0.6<br>(n=20)       |
| DMW3                 | 7.1 ± 0.5<br>(n=20) | 1.8 ± 2.3<br>(n=14)      | 871 ± 146<br>(n=22)                   | 4362 ± 476<br>(n=22)                                | 282.1 ± 30<br>(n=5)       | 373.4 ± 79.4<br>(n=22)                   | 1.1 ± 2.7<br>(n=22)                       | 2.7 ± 8.3<br>(n=22)                      | 424.0 ± 73.6<br>(n=22)    |
| DMW4                 | 7.8 ± 0.7<br>(n=17) | 1.6 ± 1.2<br>(n=13)      | 50 ± 24<br>(n=21)                     | 448 ± 57<br>(n=21)                                  | 4.5 ± 0.8<br>(n=5)        | 0.2 ± 0.7<br>(n=21)                      | 0.1 ± 0.2<br>(n=21)                       | <0.1<br>(n=21)                           | 0.5 ± 1.3<br>(n=21)       |
| DMW5                 | 7.4 ± 0.5<br>(n=18) | 1.5 ± 1.2<br>(n=13)      | 35 ± 11<br>(n=22)                     | 534 ± 30<br>(n=22)                                  | 6.6 ± 1.0<br>(n=5)        | 0.1 ± 0.1<br>(n=22)                      | 1.0 ± 0.5<br>(n=22)                       | <0.1<br>(n=22)                           | 0.4 ± 0.1<br>(n=22)       |
| DMW6                 | 7.2 ± 0.4<br>(n=18) | 1.3 ± 1.4<br>(n=11)      | 394 ± 25<br>(n=21)                    | 778 ± 67<br>(n=21)                                  | 25.8 ± 5.4<br>(n=5)       | 4.0 ± 1.0<br>(n=21)                      | 0.2 ± 0.2<br>(n=21)                       | <0.1<br>(n=21)                           | 6.6 ± 0.9<br>(n=21)       |
| DMW10                | 7.1 ± 0.4<br>(n=16) | 1.9 ± 2.1<br>(n=15)      | 234 ± 7<br>(n=17)                     | 712 ± 15<br>(n=17)                                  | 58.5 ± 1.0<br>(n=5)       | 0.2 ± 0.1<br>(n=17)                      | 0.1 ± 0.2<br>(n=17)                       | 0.1 ± 0<br>(n=17)                        | 3.1 ± 0.1<br>(n=17)       |
| DMW11                | 7.1 ± 0.2<br>(n=15) | 1.5 ± 1.3<br>(n=14)      | 437 ± 121<br>(n=16)                   | 771 ± 38<br>(n=16)                                  | 18.0 ± 1.7<br>(n=5)       | 0.3 ± 0.2<br>(n=16)                      | 18.5 ± 2.7<br>(n=16)                      | 0.1 ± 0.3<br>(n=16)                      | 1.6 ± 0.8<br>(n=16)       |
| DMW12                | 7.6 ± 0.6<br>(n=15) | 1.6 ± 1.4<br>(n=14)      | 75 ± 11<br>(n=16)                     | 405 ± 24<br>(n=16)                                  | 3.9 ± 0.6<br>(n=5)        | 0.1 ± 0.1<br>(n=16)                      | 2.8 ± 0.5<br>(n=16)                       | 0.1 ± 0<br>(n=16)                        | 0.3 ± 0.2<br>(n=16)       |
| DMW13                | 7.2 ± 0.2<br>(n=15) | 1.1 ± 1.3<br>(n=15)      | 70 ± 19<br>(n=16)                     | 767 ± 119<br>(n=16)                                 | 7.7 ± 1.7<br>(n=5)        | 0.9 ± 1.0<br>(n=16)                      | 19.2 ± 8.7<br>(n=16)                      | 0.2 ± 0.2<br>(n=16)                      | 1.8 ± 1.4<br>(n=16)       |
| DMW14                | 7.3 ± 0.4<br>(n=13) | 0.9 ± 1.0<br>(n=13)      | 7 ± 5<br>(n=15)                       | 445 ± 66<br>(n=15)                                  | 3.7 ± 0.6<br>(n=5)        | 0.3 ± 0.1<br>(n=15)                      | <0.1<br>(n=15)                            | <0.1<br>(n=15)                           | 0.3 ± 0.2<br>(n=15)       |
| DMW15                | 7.4 ± 0.5<br>(n=13) | 2.3 ± 3.3<br>(n=13)      | 14 ± 1<br>(n=16)                      | 670 ± 32<br>(n=16)                                  | 3.8 ± 0.9<br>(n=5)        | 0.1 ± 0<br>(n=16)                        | <0.1<br>(n=16)                            | <0.1<br>(n=16)                           | <0.2<br>(n=16)            |
| DMW16                | 7.1 ± 0.2<br>(n=12) | 1.8 ± 2.3<br>(n=11)      | 65 ± 7<br>(n=16)                      | 604 ± 18<br>(n=16)                                  | 7.3 ± 0.5<br>(n=5)        | <0.1<br>(n=16)                           | 0.1 ± 0.1<br>(n=16)                       | <0.1<br>(n=16)                           | 0.3 ± 0.1<br>(n=16)       |
| DP10-1               | 7.2 ± 0.4<br>(n=22) | 1.0 ± 1.1<br>(n=14)      | <5<br>(n=23)                          | 467 ± 19<br>(n=23)                                  | 3.7 ± 0.5<br>(n=5)        | 0.7 ± 0.1<br>(n=23)                      | <0.1<br>(n=23)                            | <0.1<br>(n=23)                           | 1.0 ± 0.5<br>(n=23)       |
| DP10-2               | 7.1 ± 0.2<br>(n=21) | 1.3 ± 1.6<br>(n=15)      | 68 ± 16<br>(n=22)                     | 701 ± 36<br>(n=22)                                  | 6.3 ± 1.1<br>(n=5)        | 1.2 ± 0.9<br>(n=22)                      | 12.6 ± 4.5<br>(n=22)                      | 0.1 ± 0.1<br>(n=22)                      | 2.1 ± 0.9<br>(n=22)       |
| DP11-10b             | 6.8 ± 0.3<br>(n=16) | 0.8 ± 1.3<br>(n=15)      | 22 ± 14<br>(n=17)                     | 689 ± 102<br>(n=17)                                 | 30.3 ± 24.9<br>(n=5)      | 0.5 ± 0.1<br>(n=17)                      | 0.5 ± 1.7<br>(n=17)                       | <0.1<br>(n=17)                           | 0.7 ± 0.2<br>(n=17)       |
| DP11-11b             | 7.0 ± 0.2<br>(n=15) | 0.8 ± 1.2<br>(n=14)      | 16 ± 3<br>(n=16)                      | 604 ± 67<br>(n=16)                                  | 8.9 ± 2.2<br>(n=5)        | 1.2 ± 0<br>(n=16)                        | <0.1<br>(n=16)                            | <0.1<br>(n=16)                           | 1.3 ± 0.1<br>(n=16)       |
| DP11-12b             | 7.2 ± 0.3<br>(n=14) | 2.4 ± 2.5<br>(n=14)      | 98 ± 20<br>(n=15)                     | 492 ± 23<br>(n=15)                                  | 6.5 ± 0.6<br>(n=5)        | 0.1 ± 0.1<br>(n=15)                      | 1.4 ± 1.3<br>(n=15)                       | <0.1<br>(n=15)                           | 0.5 ± 0.1<br>(n=15)       |
| DP11-13b             | 7.2 ± 0.3<br>(n=15) | 1.0 ± 1.4<br>(n=15)      | 15 ± 3<br>(n=16)                      | 436 ± 26<br>(n=16)                                  | 11.7 ± 4.2<br>(n=5)       | 0.7 ± 0<br>(n=16)                        | <0.1<br>(n=16)                            | <0.1<br>(n=16)                           | 0.9 ± 0.1<br>(n=16)       |
| DP11-14b             | 7.0 ± 0.2<br>(n=13) | 0.5 ± 0.6<br>(n=13)      | 6 ± 3<br>(n=16)                       | 461 ± 47<br>(n=16)                                  | 7.3 ± 1.1<br>(n=5)        | 0.9 ± 0.1<br>(n=16)                      | <0.1<br>(n=16)                            | <0.1<br>(n=16)                           | 1.0 ± 0.1<br>(n=16)       |
| DP11-15b             | 7.2 ± 0.2<br>(n=14) | 0.5 ± 2.8<br>(n=14)      | 6 ± 2<br>(n=17)                       | 442 ± 91<br>(n=17)                                  | 6.4 ± 2.6<br>(n=6)        | 0.7 ± 0.1<br>(n=17)                      | <0.1<br>(n=17)                            | <0.1<br>(n=17)                           | 0.8 ± 0.2<br>(n=17)       |
| DP11-16b             | 7.1 ± 0.3<br>(n=14) | 0.6 ± 0.8<br>(n=13)      | 33 ± 3<br>(n=17)                      | 531 ± 55<br>(n=17)                                  | 9.0 ± 8.4<br>(n=5)        | 0.8 ± 0.1<br>(n=17)                      | <0.1<br>(n=17)                            | 0.1 ± 0<br>(n=17)                        | 0.9 ± 0.1<br>(n=17)       |

5 \*For EMS filtrate and catch-basin filtrate these values are NO<sub>3</sub>-N+NO<sub>2</sub>-N

6 Table R2 Measured pH, DO and concentrations of chloride (Cl<sup>-</sup>), bicarbonate (HCO<sub>3</sub><sup>-</sup>), dissolved  
7 organic carbon (DOC) and N-species in groundwater wells and water filtered from the EMS at CFO4  
8 (mean ± standard deviation).

| Sample ID    | pH                  | DO<br>(mg L <sup>-1</sup> ) | Cl <sup>-</sup><br>(mg L <sup>-1</sup> ) | HCO <sub>3</sub> <sup>-</sup><br>(mg L <sup>-1</sup> ) | DOC<br>(mg L <sup>-1</sup> ) | NH <sub>3</sub> -N<br>(mg L <sup>-1</sup> ) | NO <sub>3</sub> -N*<br>(mg L <sup>-1</sup> ) | NO <sub>2</sub> -N<br>(mg L <sup>-1</sup> ) | TKN<br>(mg L <sup>-1</sup> ) |
|--------------|---------------------|-----------------------------|------------------------------------------|--------------------------------------------------------|------------------------------|---------------------------------------------|----------------------------------------------|---------------------------------------------|------------------------------|
| EMS filtrate | -                   | -                           | 1074 ±<br>379 (n=2)                      | 5795 ±<br>1544<br>(n=2)                                | 3367<br>(n=1)                | 865 ± 182<br>(n=2)                          | <0.7<br>(n=2)                                | -                                           | -                            |
| BC1          | 7.2 ± 0.7<br>(n=9)  | 1.2 ± 1.7<br>(n=8)          | <10<br>(n=11)                            | 494 ± 13<br>(n=11)                                     | 5.0 ± 0.8<br>(n=4)           | <0.1<br>(n=11)                              | <0.1<br>(n=11)                               | <0.1<br>(n=11)                              | <0.2<br>(n=11)               |
| BC2          | 7.0 ± 0.5<br>(n=10) | 1.3 ± 1.4<br>(n=9)          | 6 ± 3<br>(n=12)                          | 516 ± 33<br>(n=12)                                     | 6.0 ± 3.0<br>(n=4)           | <0.1<br>(n=12)                              | 1.1 ± 2.7<br>(n=12)                          | <0.1<br>(n=12)                              | 0.3 ± 0.2<br>(n=12)          |
| BC3          | 7.0 ± 0.5<br>(n=11) | 0.8 ± 0.8<br>(n=10)         | <5<br>(n=13)                             | 504 ± 21<br>(n=13)                                     | 6.9 ± 2.9<br>(n=4)           | <0.1<br>(n=13)                              | 0.1 ± 0.1<br>(n=13)                          | <0.1<br>(n=13)                              | 0.2 ± 0.1<br>(n=13)          |
| BC4          | 7.2 ± 0.3<br>(n=21) | 1.3 ± 1.9<br>(n=10)         | 58 ± 64<br>(n=24)                        | 576 ± 110<br>(n=24)                                    | 9.2 ± 3.5<br>(n=9)           | <0.1<br>(n=24)                              | 8.8 ± 13.2<br>(n=24)                         | <0.1<br>(n=24)                              | 0.8 ± 0.8<br>(n=24)          |
| BC5          | 7.1 ± 0.2<br>(n=6)  | 2.3 ± 1.5<br>(n=6)          | 26 ± 6<br>(n=8)                          | 498 ± 51<br>(n=8)                                      | 6.8 ± 3.1<br>(n=3)           | <0.1<br>(n=8)                               | 5.7 ± 1.5<br>(n=8)                           | <0.1<br>(n=8)                               | 0.6 ± 0.4<br>(n=8)           |
| BMW1         | 6.9 ± 0.2<br>(n=23) | 1.3 ± 1.1<br>(n=11)         | 305 ± 251<br>(n=28)                      | 926 ± 190<br>(n=28)                                    | 21.5 ±<br>12.4<br>(n=11)     | <0.1<br>(n=28)                              | 2.2 ± 2.5<br>(n=28)                          | <0.1<br>(n=28)                              | 1.1 ± 0.9<br>(n=28)          |
| BMW2         | 6.4 ± 1.5<br>(n=20) | 3.1 ± 1.8<br>(n=12)         | 502 ± 97<br>(n=22)                       | 1186 ± 87<br>(n=22)                                    | 20.2 ± 4.9<br>(n=9)          | <0.1<br>(n=22)                              | 6.0 ± 7.4<br>(n=22)                          | 0.1 ± 0.1<br>(n=22)                         | 1.7 ± 0.4<br>(n=22)          |
| BMW3         | 6.9 ± 0.3<br>(n=20) | 1.5 ± 1.3<br>(n=9)          | 182 ± 81<br>(n=25)                       | 881 ± 146<br>(n=25)                                    | 15.6 ± 3.3<br>(n=9)          | <0.1<br>(n=25)                              | 17.4 ±<br>10.3<br>(n=25)                     | 0.1 ± 0.1<br>(n=25)                         | 1.6 ± 0.8<br>(n=25)          |
| BMW4         | 7.0 ± 0.2<br>(n=17) | 1.3 ± 1.1<br>(n=11)         | 188 ± 74<br>(n=24)                       | 666 ± 55<br>(n=24)                                     | 12.0 ± 3.3<br>(n=11)         | <0.1<br>(n=24)                              | 33.6 ±<br>21.1<br>(n=24)                     | 0.2 ± 0.3<br>(n=24)                         | 2.6 ± 2.9<br>(n=24)          |
| BMW5         | 6.8 ± 0.2<br>(n=6)  | 1.5 ± 1.5<br>(n=6)          | 106 ± 23<br>(n=8)                        | 975 ± 163<br>(n=8)                                     | 8.6 ± 1.3<br>(n=3)           | <0.1<br>(n=8)                               | 6.5 ± 4.8<br>(n=8)                           | 0.1 ± 0<br>(n=8)                            | 0.7 ± 0.3<br>(n=8)           |
| BMW6         | 7.0 ± 0.3<br>(n=6)  | 1.6 ± 1.3<br>(n=6)          | 156 ± 18<br>(n=8)                        | 538 ± 27<br>(n=8)                                      | 6.9 ± 1.7<br>(n=3)           | <0.1<br>(n=8)                               | 0.4 ± 0.2<br>(n=8)                           | 0.1 ± 0<br>(n=8)                            | 0.5 ± 0.1<br>(n=8)           |
| BMW7         | 6.8 ± 0.2<br>(n=6)  | 2.4 ± 2.4<br>(n=6)          | 127 ± 15<br>(n=8)                        | 699 ± 65<br>(n=8)                                      | 8.1 ± 2.8<br>(n=3)           | <0.1<br>(n=8)                               | 9.2 ± 3.0<br>(n=8)                           | 0.1 ± 0<br>(n=8)                            | 0.7 ± 0.4<br>(n=8)           |
| BP10-15e     | 7.3 ± 0.2<br>(n=15) | 1.3 ± 1.3<br>(n=9)          | 7 ± 4<br>(n=19)                          | 493 ± 33<br>(n=19)                                     | 3.4 ± 0.4<br>(n=7)           | 0.1 ± 0.1<br>(n=19)                         | 0.1 ± 0.1<br>(n=19)                          | <0.1<br>(n=19)                              | 0.2 ± 0.1<br>(n=19)          |
| BP10-15w     | 7.2 ± 0.1<br>(n=9)  | 0.8 ± 0.6<br>(n=9)          | <5<br>(n=17)                             | 507 ± 11<br>(n=17)                                     | 3.5 ± 0.6<br>(n=4)           | <0.2<br>(n=17)                              | 0.3 ± 1.0<br>(n=17)                          | <0.1<br>(n=17)                              | 0.2 ± 0.1<br>(n=17)          |
| BP5-15       | 7.2 ± 0.1<br>(n=6)  | 1.5 ± 1.2<br>(n=6)          | <5<br>(n=8)                              | 509 ± 12<br>(n=8)                                      | 5.0 ± 1.1<br>(n=3)           | <0.1<br>(n=8)                               | <0.1<br>(n=8)                                | <0.1<br>(n=8)                               | <0.2<br>(n=8)                |
| BP6-15       | 7.1 ± 0.4<br>(n=6)  | 1.2 ± 1.2<br>(n=6)          | <5<br>(n=7)                              | 487 ± 7<br>(n=7)                                       | 3.3 ± 1.1<br>(n=3)           | <0.2<br>(n=7)                               | <0.1<br>(n=7)                                | <0.1<br>(n=7)                               | <0.2<br>(n=7)                |

9 \*For EMS filtrate this value is NO<sub>3</sub>-N+NO<sub>2</sub>-N
